# Supplementary material for: Project Stakeholder Management as the Integration of Stakeholder Salience, Public Participation, and Nonmarket Strategies
Source: Springer Nature journal article supplement (doi:10.1007/s41464-020-00092-0), 2020-05-12
Supplement: MOESM1 [file 17977012]

**Project Stakeholder Management as the Integration of Stakeholder Salience, Public Participation, and Nonmarket Strategies**

**- Online Supplementary Appendix -**

# Fig. A1: Key phases and related events of the two cases


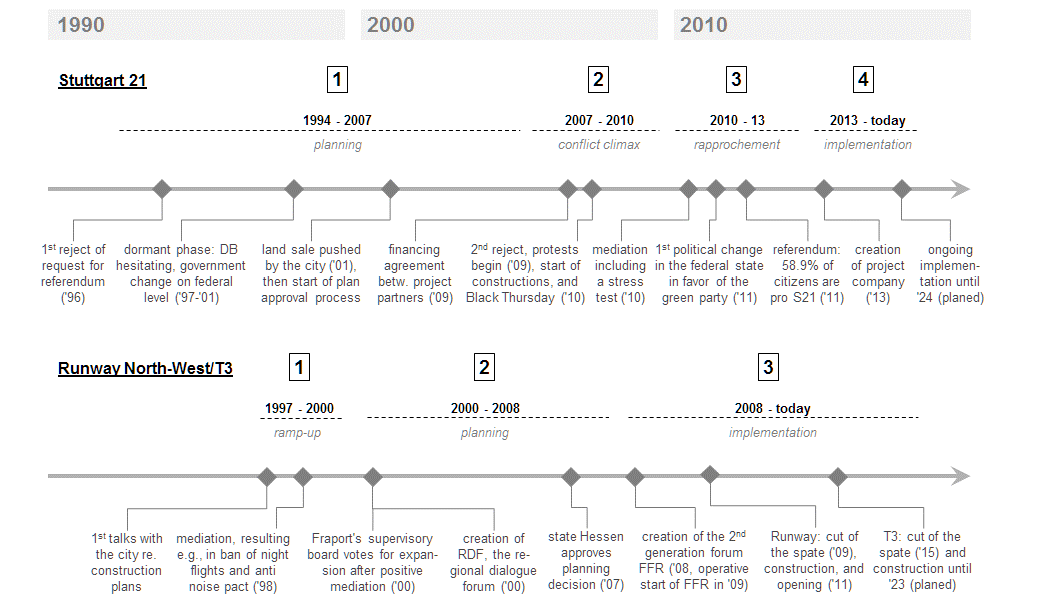


Table A1: Overview of informants' position as well as interviews’ types and durations

Table A2: Manifestation of nonmarket strategies in hard and soft nonmarket assets with regards to local communities (phase 1 vs. 2017/status quo)

Table A2 (continued)

Table A3: Influence of the nonmarket strategies orientation on the perceived salience of local communities (vs. actual salience)

Table A4: Influence of nonmarket strategies, actual salience, and perceived salience on choice of participation archetypes

**Table A5: Overview of participation instruments’ outcomes on indecisive/moderate and opponent communities**

**Table A5 (continued)**
